# Supplementary material
Source: publisher figshare collection journal article supplement (https://plos.figshare.com/articles/dataset/_/122235)
Supplement: Supplementary file 1 [file 1 › Table_S1.pdf]

**Table S1. Structures representative of the metallo-dependent phosphatase superfamily.**

| Protein<br>(PDB ID) | Structural<br>similarity<br>(DALI Z-score) | SCOP metallo-dependent phosphatase family                                                      |
|---------------------|--------------------------------------------|------------------------------------------------------------------------------------------------|
| 2xmoA <sup>a</sup>  | 26.7                                       | –                                                                                              |
| 3d03A               | 24.2                                       | GpdQ-like                                                                                      |
| 1qhwA <sup>b</sup>  | 23.3                                       | Purple acid phosphatase-like<br>(Mammalian purple acid phosphatase)                            |
| 1kbpA <sup>b</sup>  | 19.5                                       | Purple acid phosphatase-like<br>(Plant purple acid phosphatase, catalytic domain)              |
| 1uf3A               | 17.3                                       | TT1561-like                                                                                    |
| 1ii7A               | 16.1                                       | DNA double-strand break repair nuclease                                                        |
| 1ho5A<br>domain     | 13.5                                       | 5'-nucleotidase (syn. UDP-sugar hydrolase), N-terminal                                         |
| 2cv9A               | 11.9                                       | TTHA0625-like                                                                                  |
| 1t70A               | 11.9                                       | DR1281-like                                                                                    |
| 1s3lA               | 11.6                                       | YfcE-like                                                                                      |
| 1xm7A               | 9.8                                        | Hypothetical protein aq_1666                                                                   |
| 1nnwA               | 9.0                                        | Phosphoesterase-related                                                                        |
| 1auiA <sup>c</sup>  | 6.9                                        | Protein serine/threonine phosphatase<br>(Protein phosphatase-2B; PP-2B, calcineurin A subunit) |
| 1g5bB <sup>c</sup>  | 6.8                                        | Protein serine/threonine phosphatase<br>(λ Ser/Thr protein phosphatase)                        |

These structures were selected from the DALI search (Fig. S1) to look for the unique structural elements of the ADPRibase-Mn-like family (Fig. 8).

<sup>a</sup> This protein is not yet classified in SCOP, but it shows the general characteristics of the metallo-dependent phosphatase superfamily\*, and it is the closest structural homologue of zebrafish ADPRibase-Mn (PDB ID 2nxf).

<sup>b, c</sup> Two structures were selected from each of these SCOP families (SCOP domain indicated in parenthesis) because even classified in the same family they display only a 18% identity.

\* Kim, Y. G., Jeong, J. H., Ha, N. C. and Kim, K. J. (2011) Structural and functional analysis of the Lmo2642 cyclic nucleotide phosphodiesterase from *Listeria monocytogenes*. *Proteins* **79**, 1205-1214
